# Supplementary material for: SARS-CoV-2 Vaccine-Induced T-Cell Response after Three Doses in People Living with HIV on Antiretroviral Therapy Compared to Seronegative Controls (CTN 328 COVAXHIV Study)
Source: MDPI journal article supplement (doi:10.3390/v15020575), 2023-02-19
Supplement: s1 [file s1]

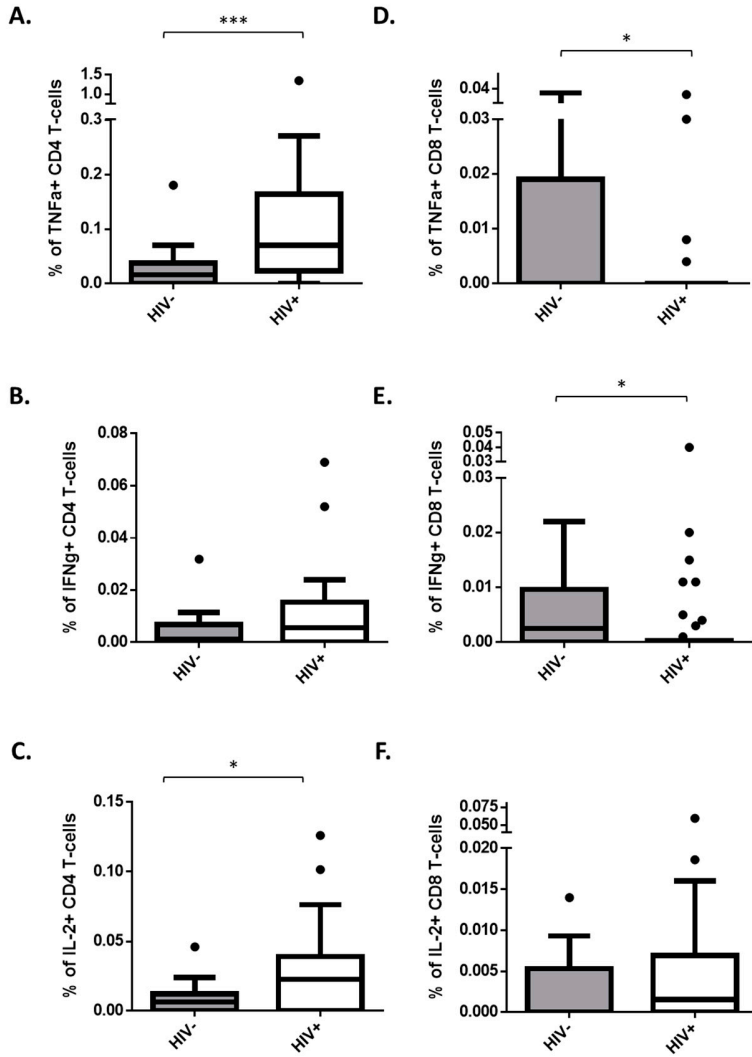

**Supplementary Figure S1:** (A–C) SARS-CoV-2-specific CD4 and CD8 T-cell response in participants vaccinated with mRNA-type SARS-CoV-2 vaccines only. Frequencies of TNFα+, IFNγ+, and IL-2+ in CD4 T-cells and (D–F) CD8 T-cells post 3rd vaccine dose in PLWH *versus* seronegative controls with. Lines in HIV+ vs HIV- plots indicate the median and interquartile range. Comparisons were made using Mann–Whitney U-test (\*  $p < 0.05$ , \*\*\*  $p < 0.001$ ).

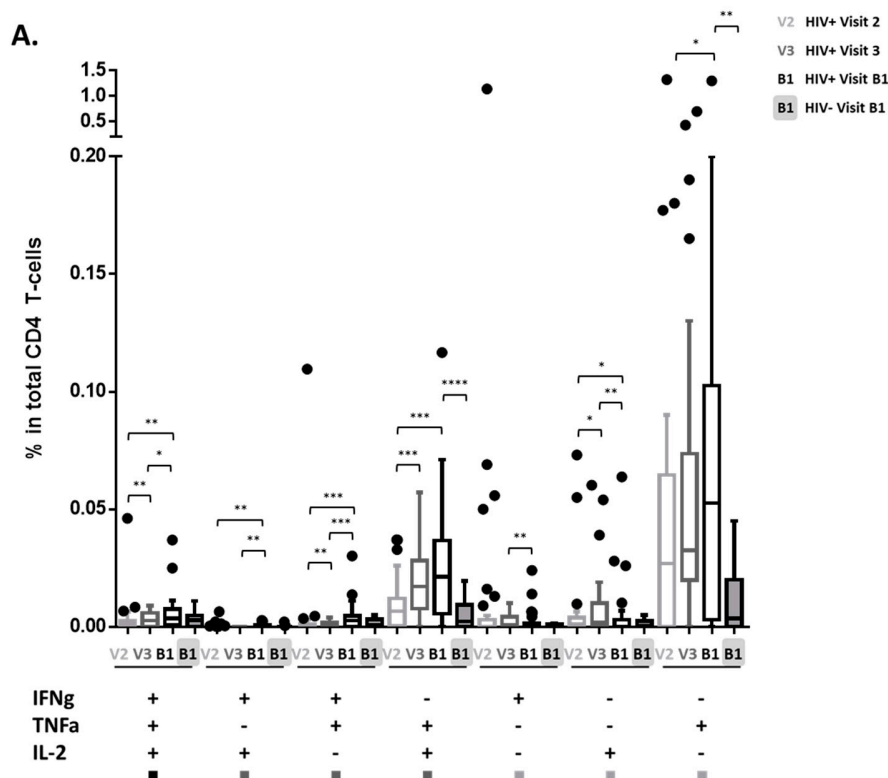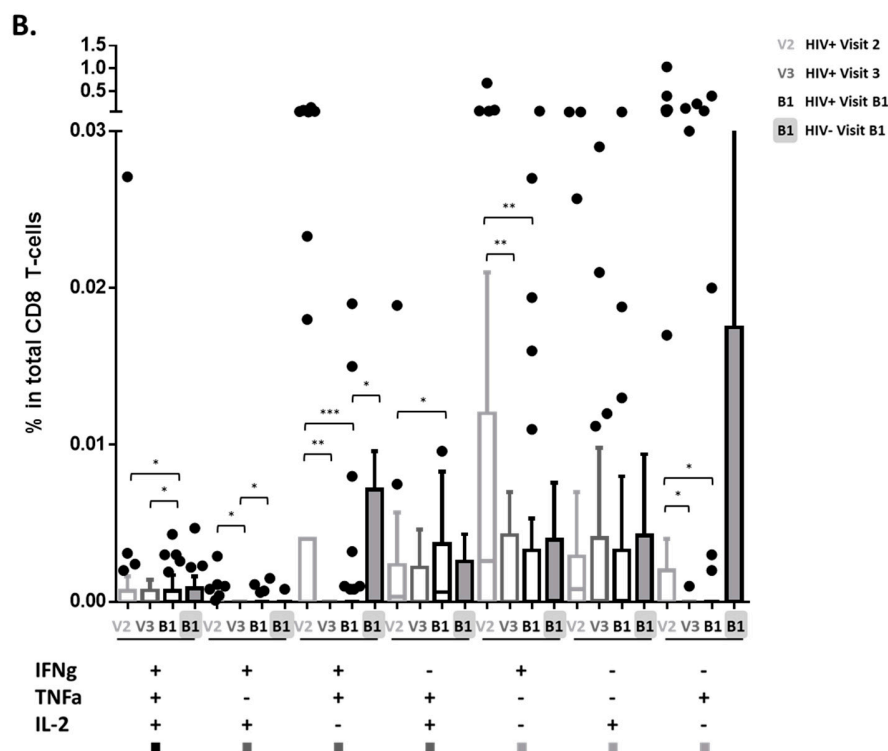

**Supplementary Figure S2:** (A) Frequencies of cytokine producing SARS-CoV-2-specific CD4 T-cells in total CD4 T-cell pool and (B) frequencies of cytokine producing SARS-CoV-2-specific CD8 T-cells in total CD8 T-cell pool at different time points in PLWH and uninfected controls. Lines in boxplots indicate the median and interquartile range. Comparisons were made using Wilcoxon-Pratt signed rank test for paired variables and Mann-Whitney for unpaired variables (\*  $p < 0.05$ , \*\*  $p < 0.01$ , \*\*\*  $p < 0.001$ , \*\*\*\*  $p < 0.0001$ ).

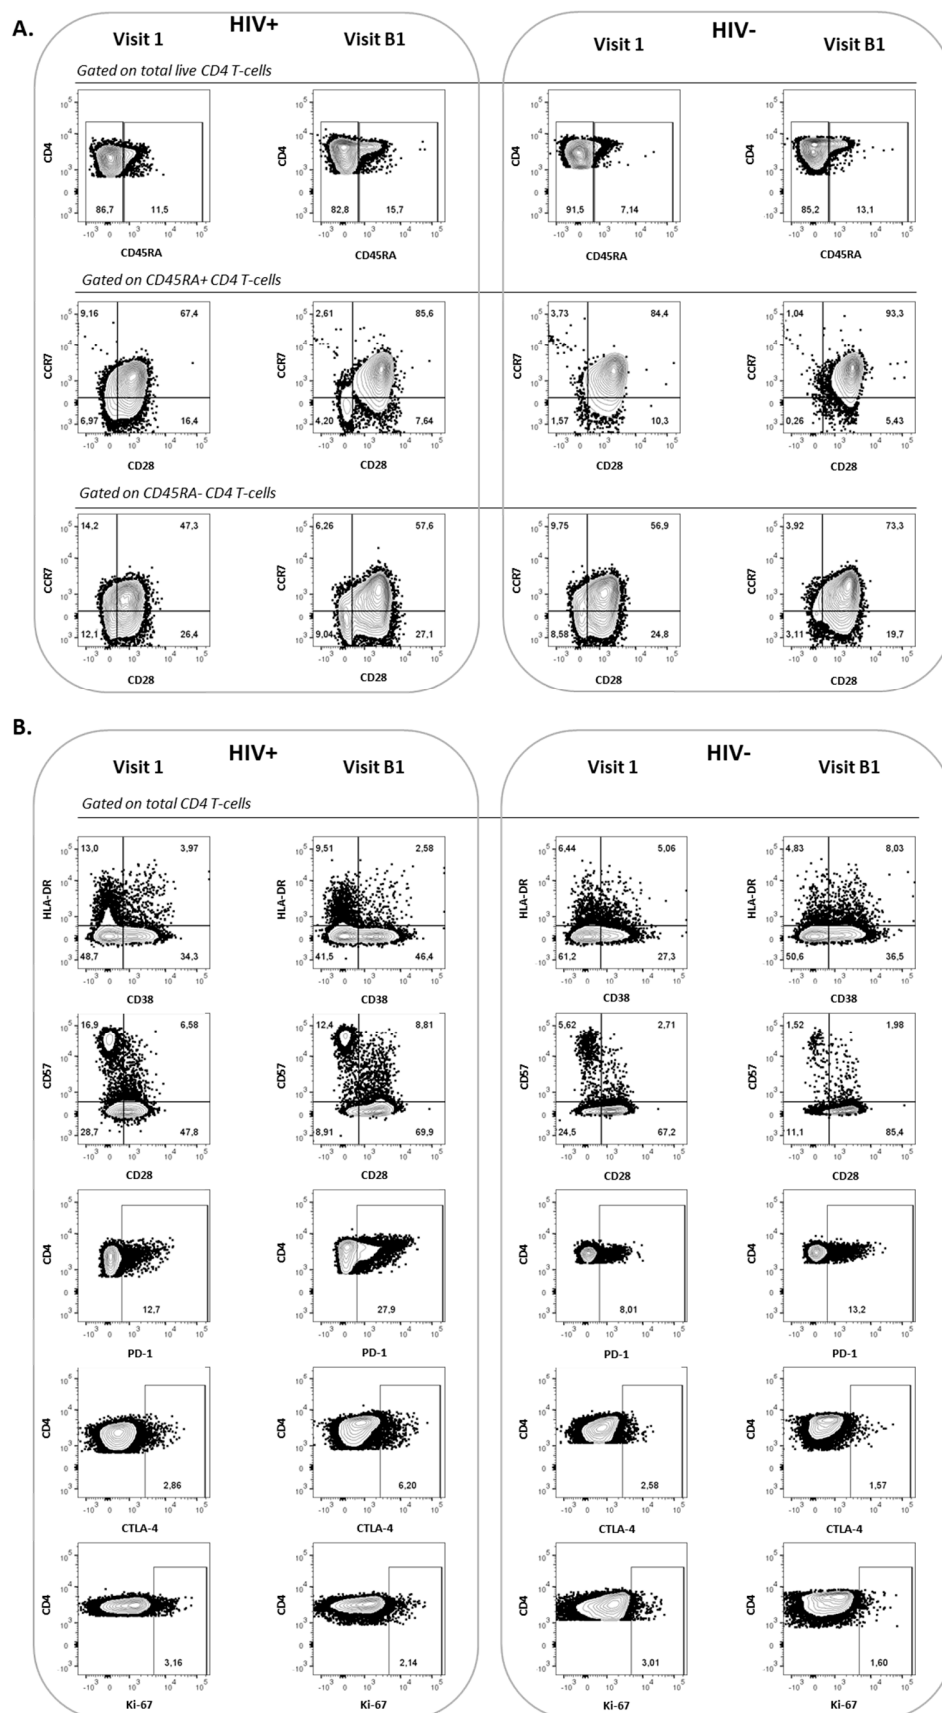

**Supplementary Figure S3: (A)** Examples of gating on CD4 T-cell memory subsets and **(B)** markers involved in CD4 T-cell function.

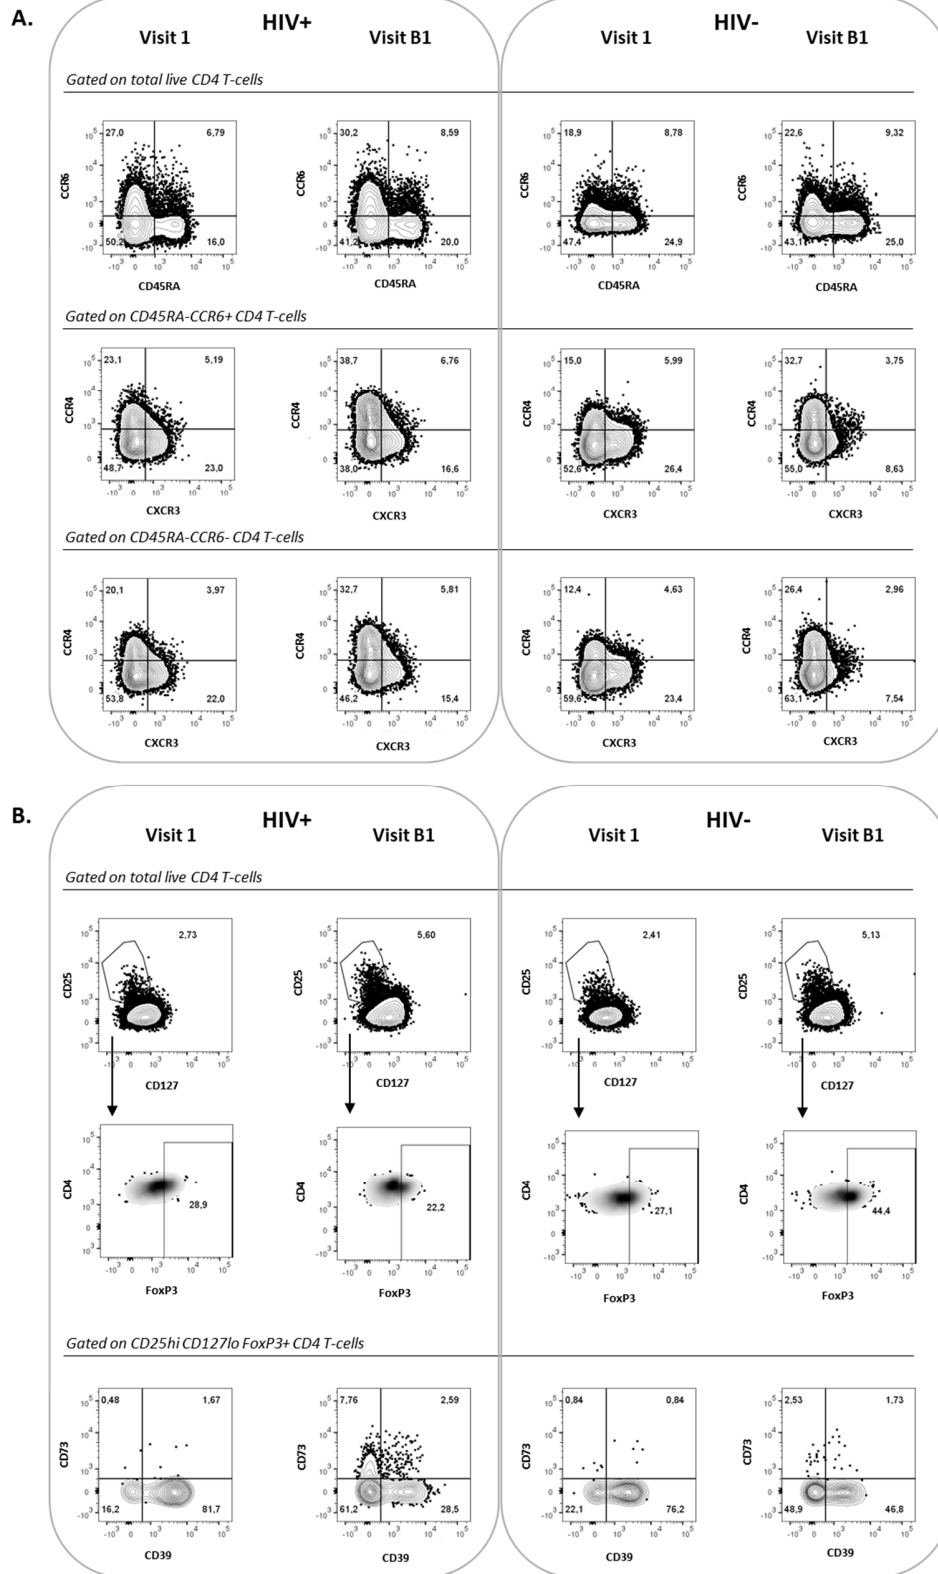

**Supplementary Figure S4: (A)** Examples of gating on CD4 helper T-cell subsets (Th17: CD45RA-CCR4+CCR6+ CXCR3-; Th1-Th17: CD45RA-CCR4-CCR6+CXCR3+; Th2: CD45RA-CCR4+CCR6- CXCR3-; Th1: CD45RA-CCR4-CCR6- CXCR3+) and **(B)** regulatory T-cells (CD25hi CD127lo FoxP3+).

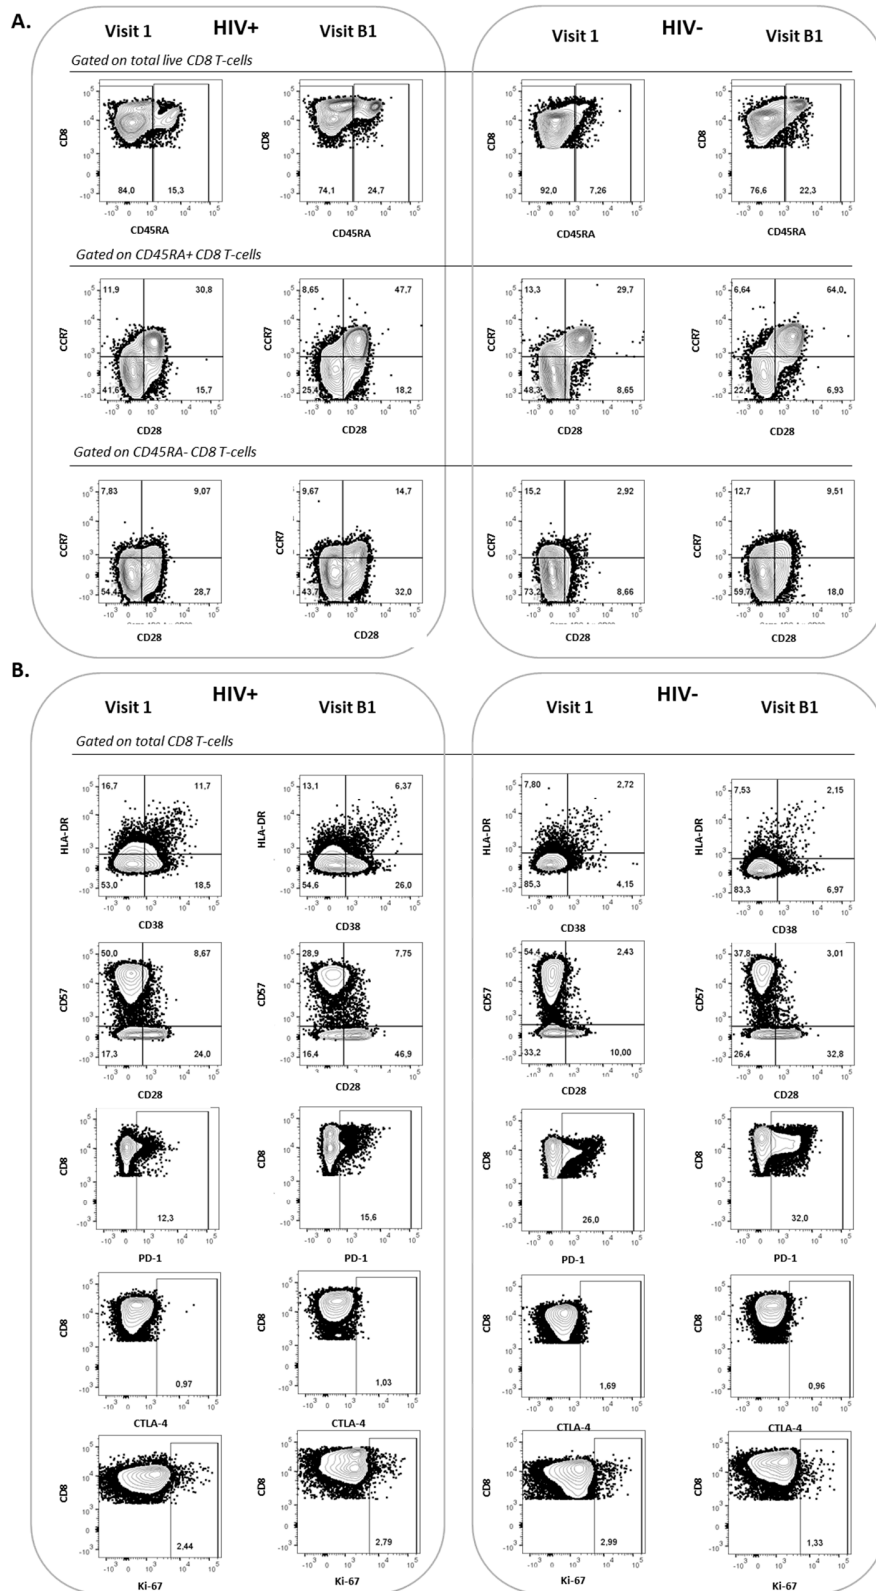

**Supplementary Figure S5: (A)** Examples of gating on CD8 T-cell memory subsets (Naïve: CD45RA+CD28+CCR7+; Central memory: CD45RA-CD28+CCR7+; Transitional memory: CD45RA-CD28+CCR7-; Effector memory: CD45RA-CD28-CCR7-; Terminally differentiated: CD45RA+CD28-CCR7-) and **(B)** markers involved in CD8 T-cell function.
