# Supplementary material for: SARS-CoV-2 Vaccine-Induced T-Cell Response after Three Doses in People Living with HIV on Antiretroviral Therapy Compared to Seronegative Controls (CTN 328 COVAXHIV Study)
Source: MDPI journal article supplement (doi:10.3390/v15020575), 2023-02-19
Supplement: s1 [file s1]

**Supplementary Table S1.** List of antibodies used for *ex vivo* phenotyping of T-cell subsets.

| <i>Ex vivo</i> T-cell phenotyping                    |            |          |               |
|------------------------------------------------------|------------|----------|---------------|
| EXTRACELLULAR                                        |            |          |               |
| mAb                                                  | Clone      | Cat. No. | Company       |
| Aqua Vivid 405nm                                     |            | L34966   | Invitrogen    |
| BV786 Mouse Anti-Human CD3                           | UCHT1      | 565491   | BD Horizon    |
| APC Mouse Anti-Human CD4                             | RPA-T4     | 555349   | BD Pharmingen |
| FITC Mouse Anti-Human CD4                            | RPA-T4     | 555346   | BD Pharmingen |
| APC-R700 Mouse Anti-Human CD8                        | RPA-T8     | 565165   | BD Horizon    |
| BV421 Mouse Anti-Human CD194 (CCR4)                  | 1G1        | 562579   | BD Horizon    |
| BB515 Mouse Anti-Human CD196 (CCR6)                  | 11A9       | 564479   | BD Horizon    |
| PE-Cy <sup>TM</sup> 5 Mouse Anti-Human CD183 (CXCR3) | 1C6/CXCR3  | 551128   | BD Pharmingen |
| APC-H7 Mouse Anti-Human CD45RA                       | HI100      | 561212   | BD Pharmingen |
| PE Mouse Anti-Human CD25                             | M-A251     | 555432   | BD Pharmingen |
| PE-Cy <sup>TM</sup> 7 Mouse Anti-Human CD127         | HIL-7R-M21 | 560822   | BD Pharmingen |
| BV711 Mouse Anti-Human CD39                          | TU66       | 563680   | BD Horizon    |
| PerCP-Cy <sup>TM</sup> 5.5 Mouse anti-Human CD197    | 150503     | 561144   | BD Pharmingen |
| APC Mouse Anti-Human CD28                            | 28.2       | 559770   | BD Pharmingen |
| BV605 Mouse Anti-Human HLA-DR                        | G46-6      | 562845   | BD Horizon    |
| PE-Cy <sup>TM</sup> 7 Mouse Anti-Human CD38          | HIT2       | 560677   | BD Pharmingen |
| BV421 Mouse Anti-Human CD57                          | NK-1       | 563896   | BD Horizon    |
| BioLegend PE anti-human CD279 (PD-1)                 | EH12.2H7   | 329906   | Biolegend     |
| BV605 Mouse Anti-Human CD73                          | AD2        | 563199   | BD Horizon    |
| INTRACELLULAR                                        |            |          |               |
| PE-CF594 Mouse Anti-Human FoxP3                      | 236A/E7    | 563955   | BD Horizon    |
| BV711 Mouse Anti-Ki-67                               | B56        | 563755   | BD Horizon    |
| PE-CF594 Mouse Anti-Human CD152                      | BNI3       | 562742   | BD Horizon    |

**Supplementary Table S2.** List of antibodies used for *in vitro* cytokine production analysis.

| <i>In vitro</i> SARS-CoV-2 Spike peptide stimulation |           |            |              |
|------------------------------------------------------|-----------|------------|--------------|
| EXTRACELLULAR                                        |           |            |              |
| mAb                                                  | Clone     | Cat. No.   | Company      |
| Aqua Vivid 405nm                                     |           | L34966     | Invitrogen   |
| BV786 Mouse Anti-Human CD3                           | UCHT1     | 565491     | BD Horizon   |
| FITC Mouse Anti-Human CD4                            | RPA-T4    | 555346     | BD Pharmigen |
| APC-R700 Mouse Anti-Human CD8                        | RPA-T8    | 565165     | BD Horizon   |
| INTRACELLULAR                                        |           |            |              |
| PE/Cyanine7 anti-human IFN- $\gamma$ Antibody        | B27       | 506518     | Biolegend    |
| PE-CF594 Mouse Anti-Human TNF                        | MAb11     | 562784     | BD Horizon   |
| PE Mouse Anti-Human IL-2                             | MQ1-17H12 | 12-7029-42 | eBioscience  |

**Supplementary Table S3.** Spearman rank correlation between participants' clinical features and SARS-CoV-2-specific CD4 T-cells.

| CLINICAL FEATURE                | % OF TNF $\alpha$ + IFN $\gamma$ + IL-2+ CELLS IN TOTAL CD4 T-CELLS | % OF TNF $\alpha$ + CELLS IN TOTAL CD4 T-CELLS | % OF IFN $\gamma$ + CELLS IN TOTAL CD4 T-CELLS | % OF IL-2+ CELLS IN TOTAL CD4 T-CELLS |
|---------------------------------|---------------------------------------------------------------------|------------------------------------------------|------------------------------------------------|---------------------------------------|
| CD4 count                       | r=-0.226; p=0.239                                                   | r=-0.077; p=0.693                              | r=-0.084; p=0.666                              | r=-0.155; p=0.422                     |
| CD4 nadir                       | r=-0.195; p=0.312                                                   | r=-0.271; p=0.154                              | r=-0.006; p=0.974                              | r=0.084; p=0.664                      |
| CD4/CD8 ratio                   | r=0.099; p=0.608                                                    | r=-0.031; p=0.872                              | r=0.183; p=0.341                               | r=-0.021; p=0.915                     |
| Duration of HIV infection (yrs) | r=0.087; p=0.653                                                    | r=0.279; p=0.143                               | r=0.139; p=0.474                               | r=0.029; p=0.883                      |

**Supplementary Table S4.** Spearman rank correlation between participants' clinical features and SARS-CoV-2-specific CD8 T-cells. Significant correlations ( $p < 0.05$ ) are highlighted in bold.

| CLINICAL FEATURE                | % OF TNF $\alpha$ + IFN $\gamma$ + IL-2+ CELLS IN TOTAL CD8 T-CELLS | % OF TNF $\alpha$ + CELLS IN TOTAL CD8 T-CELLS | % OF IFN $\gamma$ + CELLS IN TOTAL CD8 T-CELLS    | % OF IL-2+ CELLS IN TOTAL CD8 T-CELLS |
|---------------------------------|---------------------------------------------------------------------|------------------------------------------------|---------------------------------------------------|---------------------------------------|
| CD4 count                       | $r=-0.167$ ; $p=0.387$                                              | $r=-0.097$ ; $p=0.618$                         | $r=0.052$ ; $p=0.789$                             | $r=-0.038$ ; $p=0.844$                |
| CD4 nadir                       | $r=0.239$ ; $p=0.213$                                               | $r=-0.137$ ; $p=0.478$                         | $r=0.070$ ; $p=0.718$                             | $r=-0.127$ ; $p=0.513$                |
| CD4/CD8 ratio                   | $r=0.079$ ; $p=0.685$                                               | $r=0.065$ ; $p=0.737$                          | <b><math>r=0.372</math>; <math>p=0.047</math></b> | $r=0.027$ ; $p=0.889$                 |
| Duration of HIV infection (yrs) | $r=0.198$ ; $p=0.303$                                               | $r=-0.066$ ; $p=0.734$                         | $r=0.206$ ; $p=0.284$                             | $r=0.217$ ; $p=0.258$                 |

**Supplementary Table S5:** Changes in the frequencies of CD4 T-cell subsets following SARS-Cov-2 vaccination in PLWH and uninfected controls vaccinated with mRNA SARS-CoV-2 vaccine only. Results are presented as median (IQR) of the percentage (frequencies) within total alive CD4 T-cells. Study visits: V1 - pre-vaccination baseline, V2 - 1 month post 1st dose, V3 - 3 months post 2nd dose, B1 - 1 month post 3rd dose. Significant differences ( $p < 0.05$ ) are highlighted in bold. <sup>1</sup>Median (IQR); <sup>2</sup>Wilcoxon signed rank test; <sup>3</sup>Mann–Whitney U test.

| CHARACTERISTICS                                                  | PLWH<br>LONGITUDINAL       |                            |                            |                            |                           |                           |                           | UNINFECTED<br>LONGITUDINAL |                            |                           | PLWH<br>VS. UNINFECTED<br>CROSS-<br>SECTIONAL |                 |
|------------------------------------------------------------------|----------------------------|----------------------------|----------------------------|----------------------------|---------------------------|---------------------------|---------------------------|----------------------------|----------------------------|---------------------------|-----------------------------------------------|-----------------|
|                                                                  | V1<br>N = 38 <sup>1</sup>  | V2<br>N = 38 <sup>1</sup>  | V3<br>N = 38 <sup>1</sup>  | B1<br>N = 38 <sup>1</sup>  | V1 vs.<br>V2 <sup>2</sup> | V1 vs.<br>V3 <sup>2</sup> | V1 vs.<br>B1 <sup>2</sup> | V1<br>N = 24 <sup>1</sup>  | B1<br>N = 24 <sup>1</sup>  | V1 vs.<br>B1 <sup>2</sup> | V1 <sup>3</sup>                               | B1 <sup>3</sup> |
| Memory T-cell subsets                                            |                            |                            |                            |                            |                           |                           |                           |                            |                            |                           |                                               |                 |
| Naive (CD45RA+CD28+CCR7+) CD4 T-cells                            | 19.55<br>(14.62,<br>27.73) | 26.35<br>(19.67,<br>34.05) | 29.05<br>(18.27,<br>35.15) | 28.45<br>(21.33,<br>33.70) | <0.001                    | <0.001                    | <0.001                    | 12.35<br>(7.07,<br>17.35)  | 23.10<br>(9.02,<br>29.90)  | <0.001                    | 0.011                                         | 0.10            |
| Central Memory (CD45RA-<br>CD28+CCR7+) CD4 T-cells               | 42.35<br>(35.00,<br>48.13) | 42.60<br>(37.00,<br>49.88) | 42.90<br>(38.30,<br>50.08) | 44.10<br>(37.55,<br>48.95) | 0.14                      | 0.3                       | 0.5                       | 47.55<br>(40.00,<br>51.42) | 47.90<br>(39.70,<br>54.52) | 0.3                       | 0.089                                         | 0.084           |
| Transitional Memory (CD45RA-<br>CD28+CCR7-) CD4 T-cells          | 19.65<br>(15.50,<br>22.30) | 17.20<br>(14.83,<br>20.15) | 16.55<br>(14.33,<br>19.70) | 16.70<br>(13.55,<br>21.20) | 0.027                     | 0.001                     | <0.001                    | 20.45<br>(15.12,<br>22.65) | 16.15<br>(11.90,<br>19.70) | 0.042                     | >0.9                                          | 0.7             |
| Effector Memory (CD45RA-CD28-<br>CCR7-) CD4 T-cells              | 3.23<br>(1.62,<br>6.33)    | 2.00<br>(1.27,<br>4.22)    | 1.68<br>(1.01,<br>3.31)    | 1.65<br>(0.98,<br>3.40)    | <0.001                    | <0.001                    | <0.001                    | 3.90<br>(2.33,<br>4.62)    | 0.95<br>(0.73,<br>3.36)    | 0.006                     | 0.8                                           | 0.3             |
| Terminally Differentiated<br>(CD45RA+CD28-CCR7-) CD4 T-<br>cells | 0.35<br>(0.12,<br>0.70)    | 0.23<br>(0.11,<br>0.45)    | 0.23<br>(0.07,<br>0.49)    | 0.16<br>(0.08,<br>0.43)    | 0.004                     | <0.001                    | <0.001                    | 0.28<br>(0.18,<br>0.42)    | 0.12<br>(0.08,<br>0.22)    | 0.003                     | 0.5                                           | 0.3             |

| T-cell function                         |                         |                         |                         |                         |        |        |        |                        |                         |       |        |        |
|-----------------------------------------|-------------------------|-------------------------|-------------------------|-------------------------|--------|--------|--------|------------------------|-------------------------|-------|--------|--------|
| % HLA-DR+CD38+ in CD4 T-cells           | 2.32<br>(1.93, 3.67)    | 2.18<br>(1.65, 2.86)    | 2.04<br>(1.55, 2.69)    | 2.23<br>(1.74, 2.96)    | 0.010  | 0.016  | 0.013  | 2.23<br>(1.45, 4.59)   | 2.16<br>(1.33, 3.48)    | 0.4   | 0.6    | >0.9   |
| % Ki-67+ in CD4 T-cells                 | 2.70<br>(2.19, 3.98)    | 2.30<br>(2.00, 3.11)    | 2.32<br>(1.86, 2.72)    | 2.39<br>(1.87, 2.85)    | 0.074  | <0.001 | <0.001 | 2.36<br>(1.92, 3.03)   | 2.02<br>(1.52, 2.74)    | 0.040 | 0.079  | 0.2    |
| % PD-1+ in CD4 T-cells                  | 18.60<br>(14.67, 25.33) | 19.55<br>(15.12, 23.98) | 22.20<br>(16.35, 25.65) | 20.70<br>(16.12, 25.97) | 0.8    | 0.006  | 0.032  | 9.11<br>(6.68, 13.03)  | 12.00<br>(11.18, 14.42) | 0.030 | <0.001 | <0.001 |
| % CTLA-4+ in CD4 T-cells                | 2.96<br>(2.30, 3.94)    | 3.16<br>(2.16, 4.29)    | 2.73<br>(2.15, 3.79)    | 2.70<br>(2.15, 3.56)    | 0.2    | >0.9   | 0.7    | 2.44<br>(1.88, 2.98)   | 2.84<br>(1.87, 3.58)    | 0.058 | 0.033  | >0.9   |
| % Senescent (CD28-CD57+) in CD4 T-cells | 4.16<br>(0.98, 9.00)    | 2.50<br>(0.70, 6.60)    | 2.15<br>(0.71, 4.10)    | 1.61<br>(0.85, 4.82)    | <0.001 | <0.001 | <0.001 | 1.03<br>(0.33, 1.73)   | 0.24<br>(0.11, 1.90)    | 0.024 | 0.011  | 0.012  |
| % CD39+ in CD4 T-cells                  | 4.92<br>(3.66, 7.37)    | 4.92<br>(3.73, 6.81)    | 5.34<br>(4.00, 7.69)    | 5.07<br>(3.65, 6.98)    | 0.8    | 0.6    | 0.3    | 2.39<br>(2.12, 3.63)   | 2.84<br>(2.29, 3.66)    | 0.2   | <0.001 | 0.006  |
| % CD73+ in CD4 T-cells                  | 8.59<br>(5.22, 12.35)   | 8.45<br>(5.77, 12.40)   | 9.46<br>(6.10, 13.03)   | 9.12<br>(5.98, 13.55)   | 0.9    | 0.048  | 0.005  | 11.05<br>(8.55, 13.68) | 12.45<br>(8.21, 15.95)  | 0.2   | 0.11   | 0.072  |
| Chemokine receptors                     |                         |                         |                         |                         |        |        |        |                        |                         |       |        |        |

|                                                     |                            |                            |                            |                            |              |                  |              |                            |                            |                  |                  |                  |
|-----------------------------------------------------|----------------------------|----------------------------|----------------------------|----------------------------|--------------|------------------|--------------|----------------------------|----------------------------|------------------|------------------|------------------|
| % CCR4+ in CD4 T-cells                              | 17.05<br>(12.20,<br>22.48) | 16.95<br>(14.90,<br>23.58) | 19.15<br>(15.85,<br>22.48) | 18.75<br>(16.72,<br>22.87) | 0.5          | <b>0.006</b>     | 0.073        | 12.10<br>(6.36,<br>23.18)  | 14.30<br>(9.89,<br>22.15)  | 0.3              | 0.15             | 0.13             |
| % CCR6+ in CD4 T-cells                              | 38.90<br>(36.12,<br>41.20) | 38.60<br>(35.75,<br>40.25) | 39.50<br>(36.97,<br>41.25) | 39.45<br>(37.45,<br>41.25) | 0.4          | 0.7              | 0.7          | 30.45<br>(19.60,<br>32.05) | 31.65<br>(21.32,<br>35.35) | 0.2              | <b>&lt;0.001</b> | <b>&lt;0.001</b> |
| % CXCR3+ in CD4 T-cells                             | 19.45<br>(13.15,<br>26.20) | 17.60<br>(13.48,<br>21.32) | 15.70<br>(13.62,<br>18.17) | 16.90<br>(12.60,<br>18.77) | 0.13         | <b>0.004</b>     | <b>0.018</b> | 33.10<br>(25.35,<br>41.62) | 18.85<br>(12.20,<br>24.25) | <b>&lt;0.001</b> | <b>&lt;0.001</b> | 0.5              |
| Th subsets                                          |                            |                            |                            |                            |              |                  |              |                            |                            |                  |                  |                  |
| % Th17 in CD4 T-cells (CD45RA-CCR4+CCR6+ CXCR3-)    | 4.46<br>(3.26,<br>6.66)    | 4.99<br>(3.09,<br>7.38)    | 6.10<br>(5.26,<br>8.09)    | 6.11<br>(4.54,<br>7.16)    | 0.3          | <b>&lt;0.001</b> | <b>0.010</b> | 1.45<br>(1.01,<br>2.24)    | 2.77<br>(2.17,<br>4.35)    | <b>0.006</b>     | <b>&lt;0.001</b> | <b>&lt;0.001</b> |
| % Th1-Th17 in CD4 T-cells (CD45RA-CCR4-CCR6+CXCR3+) | 5.06<br>(2.71,<br>6.87)    | 3.85<br>(2.49,<br>5.55)    | 3.97<br>(2.91,<br>5.03)    | 4.12<br>(2.78,<br>5.41)    | <b>0.030</b> | <b>0.007</b>     | 0.059        | 3.69<br>(2.21,<br>6.86)    | 2.59<br>(1.76,<br>4.70)    | <b>0.007</b>     | 0.7              | <b>0.025</b>     |
| % Th2 in CD4 T-cells (CD45RA-CCR4+CCR6- CXCR3-)     | 6.36<br>(4.86,<br>8.41)    | 7.88<br>(5.95,<br>10.06)   | 8.66<br>(6.64,<br>10.31)   | 9.11<br>(6.32,<br>10.40)   | 0.053        | <b>&lt;0.001</b> | <b>0.014</b> | 4.71<br>(2.60,<br>9.66)    | 8.59<br>(4.69,<br>10.48)   | <b>0.030</b>     | 0.2              | 0.7              |
| % Th1 in CD4 T-cells (CD45RA-CCR4-CCR6- CXCR3+)     | 9.97<br>(5.84,<br>12.55)   | 9.00<br>(5.82,<br>10.52)   | 7.26<br>(5.65,<br>9.19)    | 8.14<br>(5.84,<br>8.92)    | 0.2          | <b>0.002</b>     | <b>0.013</b> | 22.10<br>(14.58,<br>25.30) | 11.15<br>(6.63,<br>14.47)  | <0.001           | <0.001           | 0.10             |
| Regulatory T-cells                                  |                            |                            |                            |                            |              |                  |              |                            |                            |                  |                  |                  |

|                                               |                      |                      |                      |                      |              |                  |                  |                      |                      |                  |              |     |
|-----------------------------------------------|----------------------|----------------------|----------------------|----------------------|--------------|------------------|------------------|----------------------|----------------------|------------------|--------------|-----|
| % Treg (CD25hi CD127lo FoxP3+) in CD4 T-cells | 0.82<br>(0.52, 1.23) | 1.03<br>(0.76, 1.95) | 1.44<br>(1.15, 2.17) | 1.56<br>(1.11, 1.97) | <b>0.003</b> | <b>&lt;0.001</b> | <b>&lt;0.001</b> | 0.62<br>(0.38, 0.96) | 1.16<br>(0.70, 1.92) | <b>&lt;0.001</b> | 0.12         | 0.3 |
| % CD39+ Treg in CD4 T-cells                   | 0.47<br>(0.28, 0.65) | 0.49<br>(0.30, 0.72) | 0.58<br>(0.43, 0.85) | 0.64<br>(0.34, 0.86) | 0.4          | <b>0.002</b>     | <b>0.003</b>     | 0.29<br>(0.15, 0.49) | 0.35<br>(0.22, 0.74) | <b>0.010</b>     | <b>0.044</b> | 0.2 |
| % CD73+ Treg in CD4 T-cells                   | 0.04<br>(0.02, 0.07) | 0.05<br>(0.03, 0.11) | 0.09<br>(0.05, 0.15) | 0.08<br>(0.05, 0.14) | <b>0.022</b> | <b>&lt;0.001</b> | <b>&lt;0.001</b> | 0.05<br>(0.01, 0.10) | 0.13<br>(0.03, 0.18) | <b>&lt;0.001</b> | 0.8          | 0.7 |
| % CD39+CD73+ Treg in CD4 T-cells              | 0.01<br>(0.01, 0.03) | 0.01<br>(0.01, 0.04) | 0.02<br>(0.02, 0.05) | 0.03<br>(0.01, 0.04) | 0.4          | <b>&lt;0.001</b> | <b>0.002</b>     | 0.02<br>(0.00, 0.04) | 0.03<br>(0.01, 0.05) | 0.2              | 0.8          | 0.6 |



**Supplementary Table S6.** Changes in the frequencies of CD8 T-cell subsets following SARS-Cov-2 vaccination in PLWH and uninfected controls vaccinated with mRNA SARS-CoV-2 vaccine only. Results are presented as median (IQR) of the percentage (frequencies) within total alive CD8 T-cells. Study visits: V1 - pre-vaccination baseline, V2 - 1 month post 1st dose, V3 - 3 months post 2nd dose, B1 - 1 month post 3rd dose. Significant differences ( $p < 0.05$ ) are highlighted in bold. <sup>1</sup>Median (IQR); <sup>2</sup>Wilcoxon signed rank test; <sup>3</sup>Mann–Whitney U test.

| CHARACTERISTICS                                     | PLWH<br>LONGITUDINAL      |                           |                           |                           |                           |                           |                           | UNINFECTED<br>LONGITUDINAL |                           |                           | PLWH<br>VS. UNINFECTED<br>CROSS-<br>SECTIONAL |                                        |
|-----------------------------------------------------|---------------------------|---------------------------|---------------------------|---------------------------|---------------------------|---------------------------|---------------------------|----------------------------|---------------------------|---------------------------|-----------------------------------------------|----------------------------------------|
|                                                     | V1<br>N = 38 <sup>1</sup> | V2<br>N = 38 <sup>1</sup> | V3<br>N = 38 <sup>1</sup> | B1<br>N = 38 <sup>1</sup> | V1<br>N = 38 <sup>1</sup> | V2<br>N = 38 <sup>1</sup> | V3<br>N = 38 <sup>1</sup> | V1<br>N = 24 <sup>1</sup>  | V1<br>N = 39 <sup>1</sup> | V2<br>N = 39 <sup>1</sup> | V3<br>N = 39 <sup>1</sup>                     | B1 <sup>3</sup><br>N = 39 <sup>1</sup> |
| <b>Memory subsets</b>                               |                           |                           |                           |                           |                           |                           |                           |                            |                           |                           |                                               |                                        |
| Naive (CD45RA+CD28+CCR7+) CD8 T-cells               | 8.33 (5.07, 15.63)        | 12.95 (8.91, 20.60)       | 15.40 (8.79, 23.02)       | 15.75 (7.96, 26.08)       | <b>&lt;0.001</b>          | <b>&lt;0.001</b>          | <b>&lt;0.001</b>          | 9.07 (5.30, 17.40)         | 25.35 (9.97, 42.77)       | <b>&lt;0.001</b>          | 0.8                                           | 0.089                                  |
| Central Memory (CD45RA-CD28+CCR7+) CD8 T-cells      | 7.70 (4.30, 13.47)        | 8.49 (5.41, 16.05)        | 10.90 (6.95, 16.50)       | 10.90 (6.40, 16.65)       | <b>0.027</b>              | <b>&lt;0.001</b>          | <b>0.003</b>              | 7.86 (5.77, 10.50)         | 13.00 (8.38, 14.82)       | <b>&lt;0.001</b>          | 0.9                                           | 0.5                                    |
| Transitional Memory (CD45RA-CD28+CCR7-) CD8 T-cells | 15.35 (10.60, 17.50)      | 17.05 (11.28, 21.02)      | 17.15 (13.12, 20.73)      | 16.40 (12.22, 21.25)      | <b>0.040</b>              | <b>0.002</b>              | <b>0.009</b>              | 12.05 (9.21, 13.88)        | 14.85 (12.30, 20.95)      | <b>0.003</b>              | 0.2                                           | 0.6                                    |
| Effector Memory (CD45RA-CD28-CCR7-) CD8 T-cells     | 24.40 (17.35, 34.98)      | 20.95 (14.72, 27.80)      | 15.25 (11.77, 26.12)      | 17.80 (12.00, 24.70)      | <b>0.009</b>              | <b>&lt;0.001</b>          | <b>&lt;0.001</b>          | 28.50 (17.47, 33.47)       | 12.60 (8.63, 21.45)       | <b>&lt;0.001</b>          | 0.7                                           | 0.13                                   |

|                                                           |                      |                      |                      |                      |        |        |        |                      |                      |        |       |        |
|-----------------------------------------------------------|----------------------|----------------------|----------------------|----------------------|--------|--------|--------|----------------------|----------------------|--------|-------|--------|
| Terminally Differentiated (CD45RA+CD28-CCR7-) CD8 T-cells | 13.90 (8.24, 19.17)  | 11.90 (7.04, 15.90)  | 9.93 (6.80, 16.45)   | 9.82 (7.18, 12.60)   | 0.001  | <0.001 | 0.021  | 8.43 (6.05, 11.25)   | 5.24 (4.45, 7.58)    | 0.005  | 0.021 | <0.001 |
| T-cell function                                           |                      |                      |                      |                      |        |        |        |                      |                      |        |       |        |
| % HLA-DR+CD38+ in CD8 T-cells                             | 3.55 (2.18, 7.49)    | 3.91 (2.42, 6.18)    | 3.72 (2.47, 5.25)    | 3.97 (2.65, 7.11)    | 0.5    | 0.7    | 0.4    | 2.95 (2.51, 3.95)    | 3.04 (2.72, 3.88)    | 0.7    | 0.3   | 0.089  |
| % Ki-67+ in CD8 T-cells                                   | 1.90 (1.63, 2.55)    | 2.13 (1.57, 2.66)    | 1.83 (1.48, 2.24)    | 1.84 (1.47, 2.46)    | 0.3    | 0.045  | 0.023  | 2.20 (1.95, 2.58)    | 1.84 (1.43, 2.15)    | <0.001 | 0.14  | 0.5    |
| % PD-1+ in CD8 T-cells                                    | 22.20 (17.20, 27.95) | 22.90 (15.57, 28.25) | 25.90 (18.68, 31.77) | 24.75 (17.45, 30.62) | 0.7    | 0.011  | 0.045  | 16.95 (11.62, 22.28) | 17.60 (15.23, 26.67) | 0.040  | 0.060 | 0.11   |
| % CTLA-4+ in CD8 T-cells                                  | 1.16 (0.87, 1.52)    | 1.13 (0.91, 1.41)    | 1.15 (0.87, 1.40)    | 1.11 (0.88, 1.57)    | 0.9    | 0.4    | 0.6    | 1.28 (1.12, 1.61)    | 1.04 (0.88, 1.39)    | 0.083  | 0.2   | 0.5    |
| % Senescent (CD28-CD57+) in CD8 T-cells                   | 36.90 (25.90, 51.78) | 31.20 (23.35, 44.67) | 27.60 (17.48, 43.40) | 28.50 (18.40, 44.52) | <0.001 | <0.001 | <0.001 | 23.80 (14.62, 35.27) | 11.45 (8.73, 22.00)  | 0.002  | 0.009 | 0.001  |
| % CD73+ in CD8 T-cells                                    | 17.75 (11.53, 31.97) | 23.40 (14.95, 32.12) | 24.45 (18.42, 39.15) | 27.05 (19.02, 38.48) | 0.005  | <0.001 | <0.001 | 29.20 (24.97, 47.55) | 51.30 (39.25, 59.45) | <0.001 | 0.005 | <0.001 |
| % CD39+ in CD8 T-cells                                    | 0.93 (0.70, 1.33)    | 1.00 (0.66, 1.44)    | 0.95 (0.61, 1.27)    | 0.88 (0.47, 1.63)    | 0.5    | 0.13   | 0.5    | 1.66 (1.05, 2.10)    | 2.05 (1.22, 2.71)    | 0.009  | 0.008 | <0.001 |
| Chemokine receptors                                       |                      |                      |                      |                      |        |        |        |                      |                      |        |       |        |

|                         |                            |                            |                            |                            |      |        |        |                            |                            |        |        |        |
|-------------------------|----------------------------|----------------------------|----------------------------|----------------------------|------|--------|--------|----------------------------|----------------------------|--------|--------|--------|
| % CCR4+ in CD8 T-cells  | 35.45<br>(28.53,<br>46.92) | 33.00<br>(24.93,<br>43.13) | 22.55<br>(16.70,<br>28.25) | 23.40<br>(17.42,<br>35.88) | 0.4  | <0.001 | <0.001 | 34.85<br>(26.93,<br>48.55) | 35.50<br>(19.05,<br>46.45) | 0.035  | 0.8    | 0.086  |
| % CCR6+ in CD8 T-cells  | 28.25<br>(26.80,<br>29.35) | 28.05<br>(25.83,<br>29.73) | 27.80<br>(25.15,<br>29.58) | 28.00<br>(25.85,<br>30.05) | >0.9 | 0.3    | >0.9   | 18.40<br>(5.70,<br>23.52)  | 22.40<br>(5.38,<br>26.52)  | 0.10   | <0.001 | <0.001 |
| % CXCR3+ in CD8 T-cells | 21.20<br>(12.85,<br>36.65) | 18.60<br>(12.85,<br>26.40) | 15.05<br>(12.05,<br>19.82) | 17.80<br>(11.47,<br>22.77) | 0.2  | <0.001 | 0.004  | 36.55<br>(28.70,<br>46.33) | 19.55<br>(15.52,<br>24.50) | <0.001 | 0.001  | 0.4    |
