# Supplementary material for: SARS-CoV-2 Vaccine-Induced T-Cell Response after Three Doses in People Living with HIV on Antiretroviral Therapy Compared to Seronegative Controls (CTN 328 COVAXHIV Study)
Source: MDPI journal article supplement (doi:10.3390/v15020575), 2023-02-19
Supplement: s1 [file s1]

## SUPPLEMENTARY MATERIALS #1

### STUDY DESIGN /METHODS

The CTN 328 study, whose primary objective was to characterize SARS-CoV-2 immunogenicity in PLWH following vaccination, was approved by the McGill University Health Centre Research Ethics Board (REB)(#2022-7857), Ottawa Health Science Network REB (#20210361-01H), University Health Network REB (#21-5504) and the University of British Columbia-Providence Health Care and Simon Fraser University REBs (#H21-01515, #H21-00742). The SSO cohort study, whose primary objective was to characterize natural and vaccine-induced SARS-CoV2 humoral immune response over time, was approved by Ottawa Health Science Network REB (#20200481-01H).

**CTN 328 Participants:** Sites were encouraged to enrol PLWH previously excluded or underrepresented in early COVID-19 vaccine studies, including those at risk of worse outcomes upon contracting COVID-19 infection: older age ( $\geq 55$  years, immune non-responders (CD4 T-cell count  $< 350$  cells/mm<sup>3</sup>, CD4/CD8  $< 0.75$  with undetectable viral load for 1+ year) and multi-morbidity ( $\geq 2$  comorbidities)<sup>[1]</sup>. Inclusion criteria included: 1) age  $\geq 16$  years; 2) having received, or planning to receive,  $\geq 1$  dose of COVID-19 vaccine; 3) HIV-seropositive. Exclusion criteria included: 1) Receipt of any blood product or immunoglobulin preparation within 1 month of vaccination; 2) signs or symptoms of active COVID-19 at enrollment. Participants who had received two COVID-19 vaccine doses prior to enrolment were eligible to participate if their 2<sup>nd</sup> vaccine dose had been administered at most four months post 1<sup>st</sup> dose.

**SSO Participants:** A subset of immunocompetent Stop the Spread Ottawa (SSO) participants were used as HIV-negative controls and were included if they had undergone parallel blood collection in relation to vaccination time. A detailed description of this cohort was recently published<sup>[2]</sup>. Enrollment for the CTN 328 study occurred from April-June 2021 in Vancouver and June 2021-January 2022 for remaining sites. The SSO study enrolled participants from March-August 2021.

**Medical history and HIV history:** Data were gathered from interviews and clinic chart reviews following written informed consent and included comorbidities, history and date of COVID-19 infection. For PLWH in the CTN328 study, year of HIV diagnosis, CD4 T-cell nadir and medications including ART were also extracted.

## REFERENCES

1. Costiniuk CT, Singer J, Langlois MA, Kulic I, Needham J, Burchell A, et al. **CTN 328: immunogenicity outcomes in people living with HIV in Canada following vaccination for COVID-19 (HIV-COV): protocol for an observational cohort study.** *BMJ Open* 2021; 11(12):e054208.
2. Collins E, Galipeau Y, Arnold C, Bosveld C, Heiskanen A, Keeshan A, et al. **Cohort profile: Stop the Spread Ottawa (SSO)—a community-based prospective cohort study on antibody responses, antibody neutralisation efficiency and cellular immunity to SARS-CoV-2 infection and vaccination.** *BMJ Open* 2022; 12(9).
